# Supplementary material for: Digestomics of Cow’s Milk: Short Digestion-Resistant Peptides of Casein Form Functional Complexes by Aggregation
Source: MDPI journal article supplement (doi:10.3390/foods9111576), 2020-10-30
Supplement: s1 [file s1]

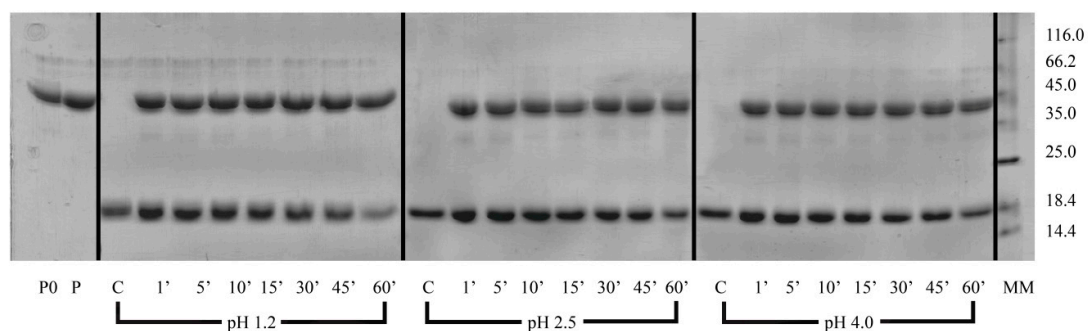

**Figure S1:** Digestion of BLG at pH 1.2, 2.5 and 4.0: P0—pepsin control, P—autoproteolysis of pepsin at pH=1.2 after 60 min, C—BLG only, 1', 5', 10', 15', 30', 45', 60'—aliquots taken at indicated timepoints, MM—molecular markers.

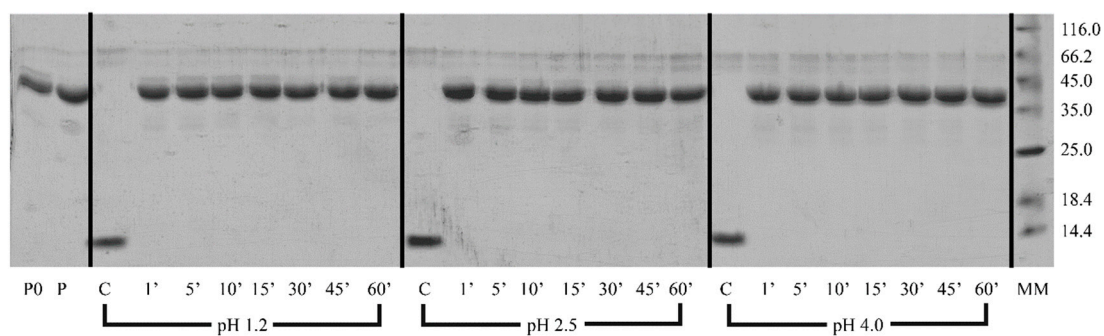

**Figure S2:** Digestion of ALA at pH 1.2, 2.5 and 4.0: P0—pepsin control, P—autoproteolysis of pepsin at pH=1.2 after 60 min, C—ALA only, 1', 5', 10', 15', 30', 45', 60'—aliquots taken at indicated timepoints, MM—molecular markers.

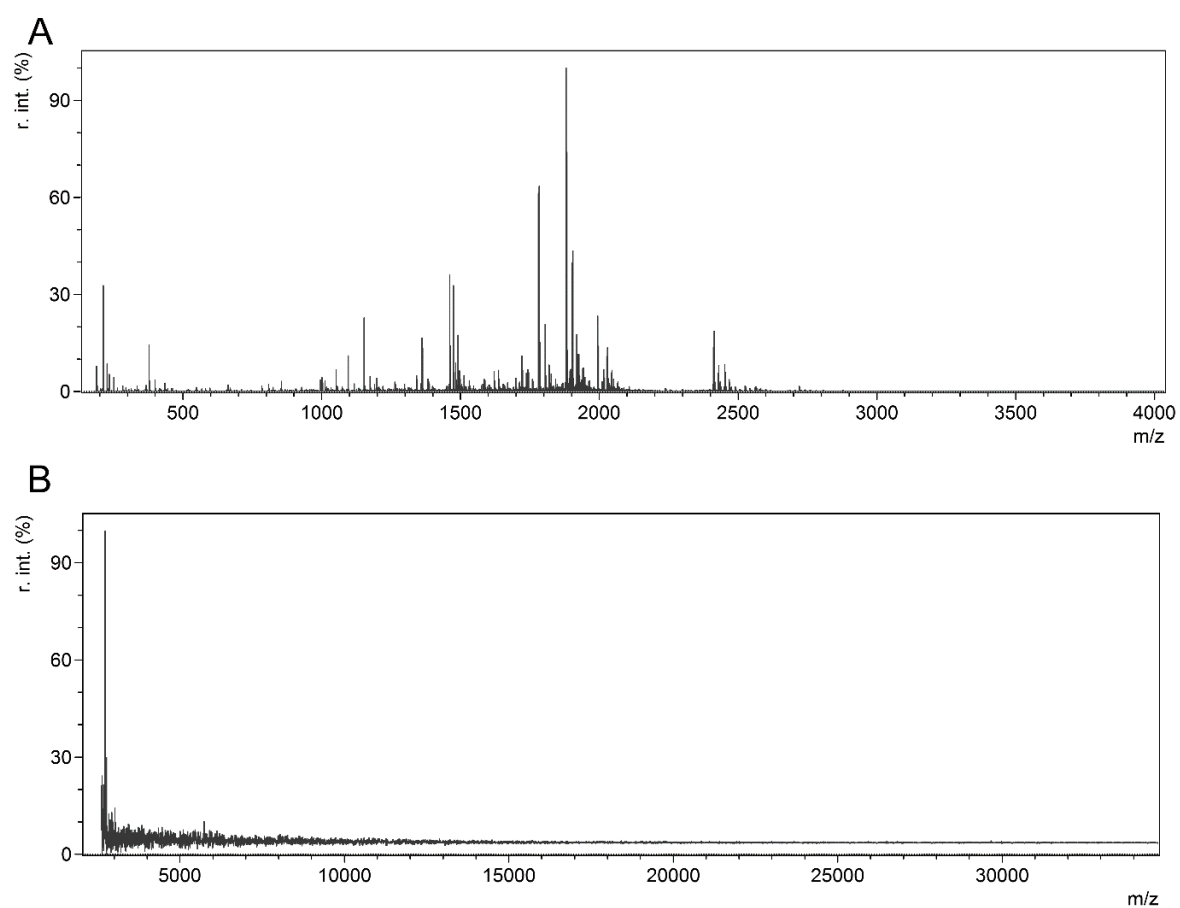

**Figure S3:** MALDI spectra of peptides used in the study. A—spectra obtained in positive ion reflector mode (peaks with  $m/z < 1000$  are mainly from matrix), B—spectra obtained in positive ion linear mode.
