# Supplementary material for: Digestomics of Cow’s Milk: Short Digestion-Resistant Peptides of Casein Form Functional Complexes by Aggregation
Source: MDPI journal article supplement (doi:10.3390/foods9111576), 2020-10-30
Supplement: s1 [file s1]

**Table S1.** IgE levels of patients used in the study determined by ImmunoCAP

| Patient | Patient's   | milk    | ALA     | BLG     | casein  | Serum dilution for IgE |
|---------|-------------|---------|---------|---------|---------|------------------------|
| 's ID   | nationality | (kAU/L) | (kAU/L) | (kAU/L) | (kAU/L) | inhibition (fold)      |
| 1       | Sweden      | 17      | -       | -       | -       | 2                      |
| 2       | Sweden      | 27      | -       | -       | -       | 2                      |
| 3       | Sweden      | 97      | 45      | 25.2    | 65.7    | 9                      |
| 4       | Sweden      | 22      | 12.4    | 4.8     | 14.8    | 2                      |
| 5       | Sweden      | 22      | 20      | 3.6     | 4.2     | 2                      |
| 6       | Sweden      | 88      | 13.6    | 11.2    | 74.4    | 8                      |
| 7       | Sweden      | 43      | 33.6    | 15.6    | 18.4    | 4                      |
| 8       | Sweden      | 56      | 3.5     | 9.5     | 175     | 5                      |
| 9       | Sweden      | 25      | 26      | 3.8     | 7       | 2                      |
| 10      | Sweden      | 26      | 10.2    | 6       | 4.6     | 2                      |
| 11      | Sweden      | 46      | 5.6     | 1.8     | 10.8    | 4                      |
| 12      | Serbia      | 192     | 33.6    | 88      | 112     | 8                      |
| 13      | Serbia      | 0.37    | 0.17    | <0.1    | 0.25    |                        |
| 14      | Serbia      | 7.5     | 1.0     | 1.7     | 7.2     |                        |
| 15      | Serbia      | 0.19    | <0.1    | <0.1    | 0.13    |                        |
| 16      | Serbia      | 73      | 21      | 6.4     | 57      |                        |
| 17      | Sweden      | n.d.*   | n.d.    | n.d.    | <0.1    |                        |
| 18      | Sweden      | n.d.    | n.d.    | n.d.    | <0.1    |                        |

|    |        |      |      |      |      |
|----|--------|------|------|------|------|
| 19 | Sweden | n.d. | n.d. | n.d. | <0.1 |
| 20 | Sweden | n.d. | n.d. | n.d. | <0.1 |
| 21 | Sweden | n.d. | n.d. | n.d. | <0.1 |
| 22 | Serbia | N/A  | N/A  | N/A  | N/A  |
| 23 | Serbia | N/A  | N/A  | N/A  | N/A  |

---

\*n.d.—not detected by ISAC ImmunoCAP (<0.3 ISU-E); N/A—no data available
